# Supplementary material for: MicroRNAs are minor constituents of extracellular vesicles that are rarely delivered to target cells
Source: PubMed Central journal article supplement (PMC8675925; doi:10.1371/journal.pgen.1009951), 2021-12-06

Fig S6

A

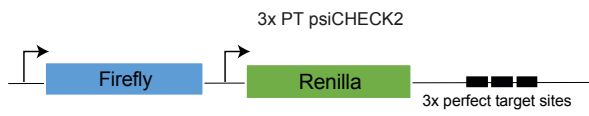

B

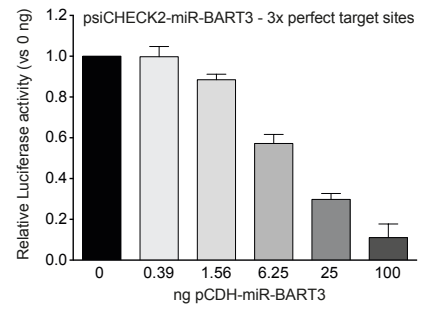

C

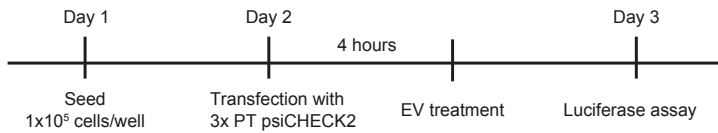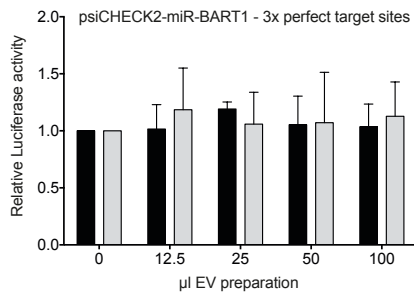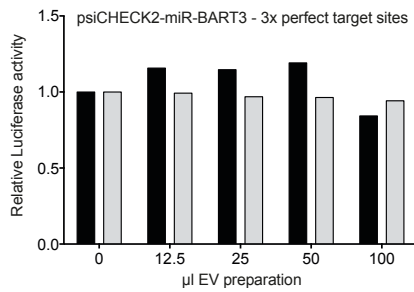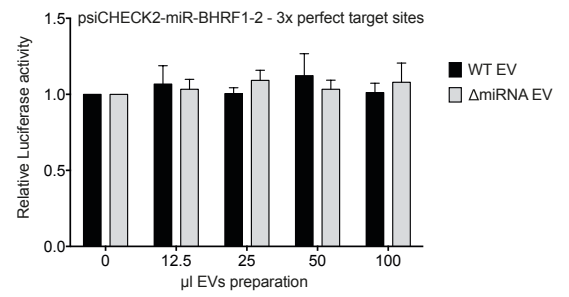

Supplement: pgen.1009951.s006.pdf [file pgen.1009951.s006.pdf]
